# Supplementary material for: Prostaglandin D2 metabolite in urine is an index of food allergy
Source: PubMed Central journal article supplement (PMC5732293; doi:10.1038/s41598-017-17798-w), 2017-12-15
Supplement: 41598_2017_17798_MOESM1_ESM.pdf [file 41598_2017_17798_MOESM1_ESM.pdf]

# **Prostaglandin D<sub>2</sub> metabolite in urine is an index of food allergy**

Shingo Maeda, Tatsuro Nakamura, Hiroaki Harada, Yuri Tachibana, Kosuke Aritake, Tatsuo Shimosawa, Yutaka Yatomi, and Takahisa Murata

Online data supplement

## Supplementary Figures

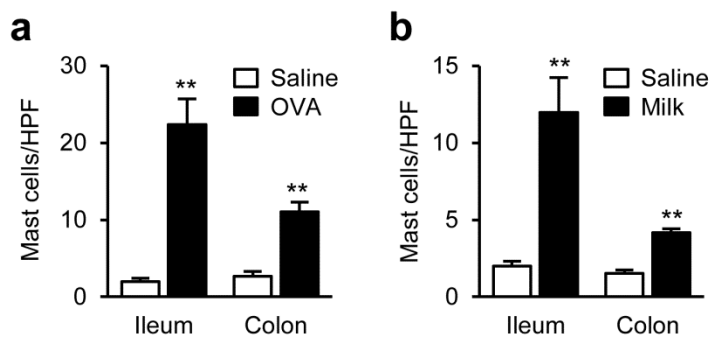

**Supplemental Figure 1. Intestinal mast cell number in murine models of food allergy.** (a and b) Mean number of CAE-positive mast cells per high-power field (HPF) in the ileum and colon after challenges of OVA (tenth, **a**) and milk (fifth, **b**), respectively ( $n = 4-5$ ). Student's  $t$  test was used. \*\*  $P < 0.01$  vs. saline-challenged mice.

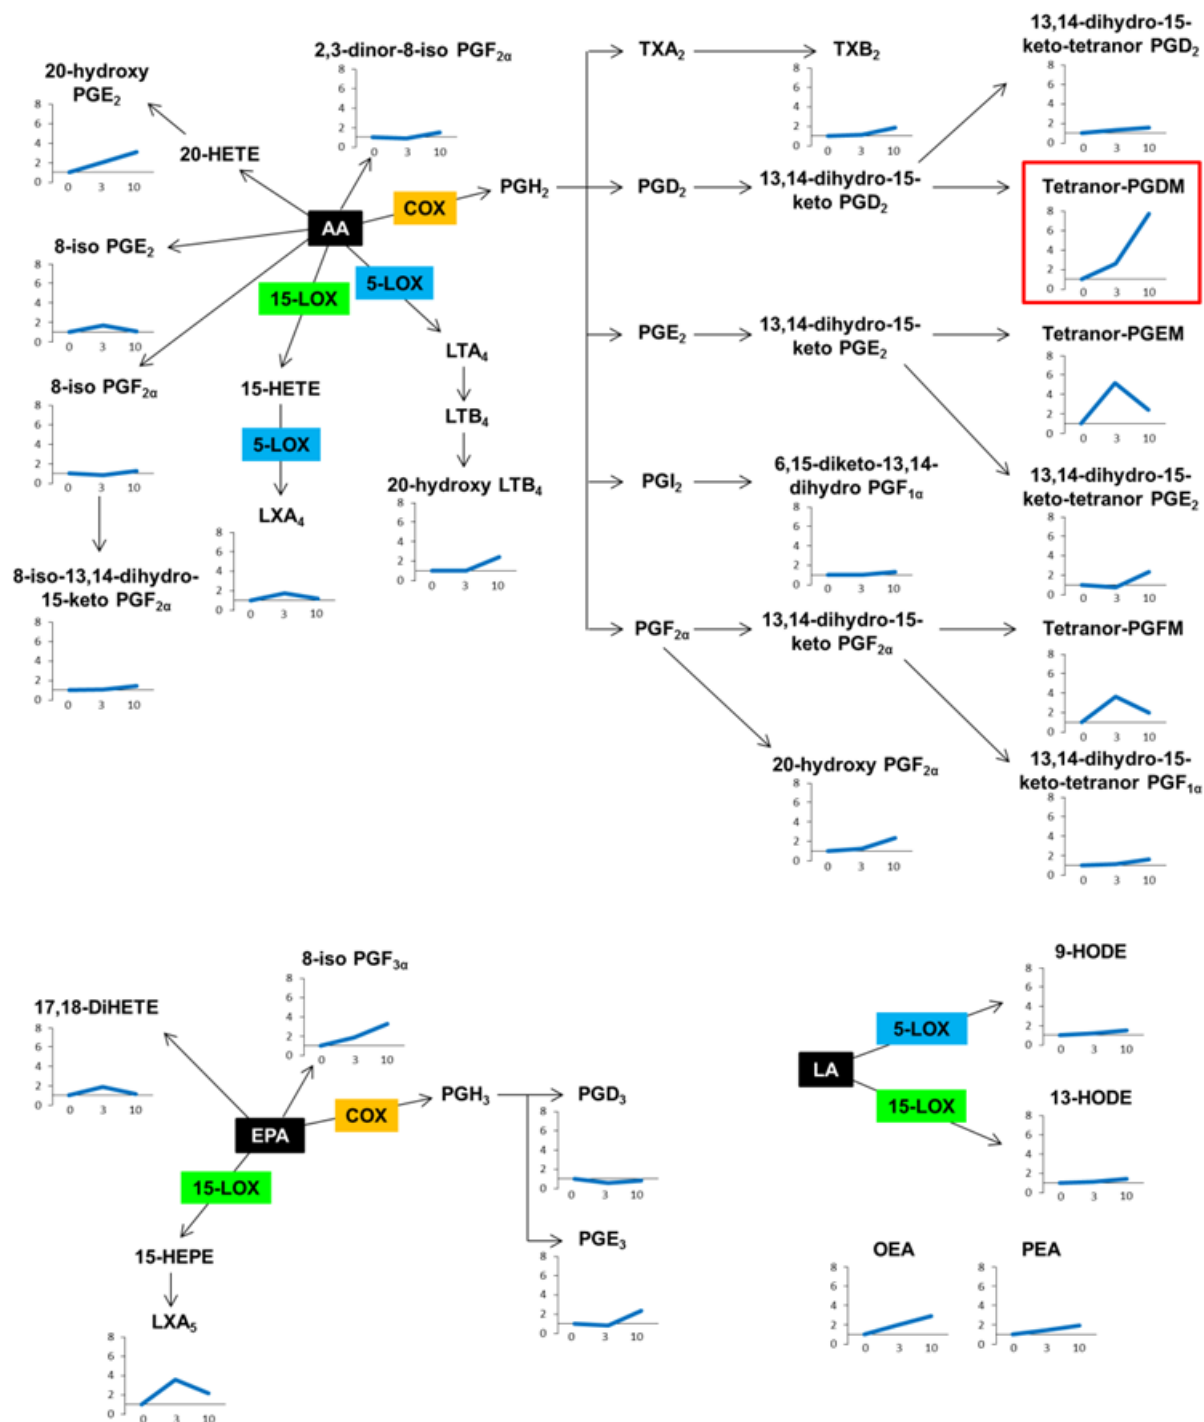

**Supplemental Figure 2. Urinary lipid metabolites in mice with oral OVA-induced food allergy.** Lipid metabolites derived from arachidonic acid (AA), eicosapentaenoic acid (EPA), linoleic acid (LA), and other lipids detected in mouse urine. Urine samples were obtained from unchallenged mice and third or tenth OVA-challenged mice ( $n = 7$  each). The horizontal axis shows the number of OVA challenges. The vertical axis shows the ratio to the urine of unchallenged mice.

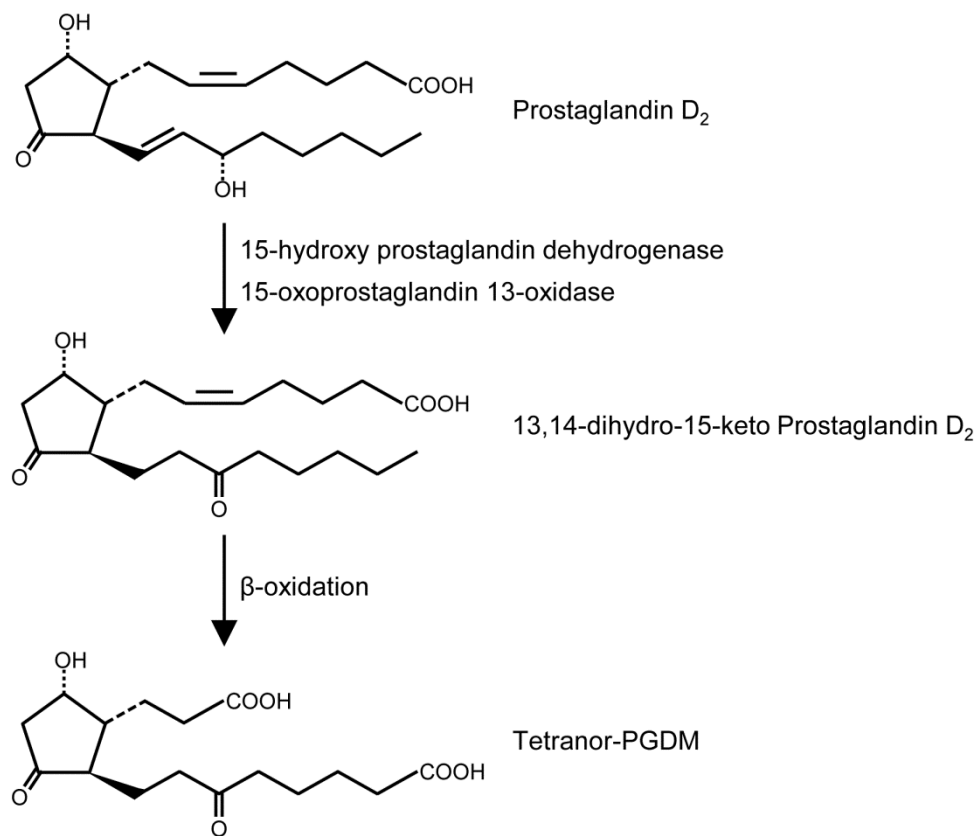

**Supplemental Figure 3. Metabolic pathway of tetranor-PGDM.** Prostaglandin D<sub>2</sub> (PGD<sub>2</sub>) can be metabolized to the 13,14-dihydro-15-keto prostaglandin D<sub>2</sub> by the enzymes 15-hydroxy prostaglandin dehydrogenase and 15-oxoprostaglandin 13-oxidase. The 13,14-dihydro-15-keto prostaglandin D<sub>2</sub> can be transformed to the urinary metabolite tetranor-PGDM via β-oxidation.

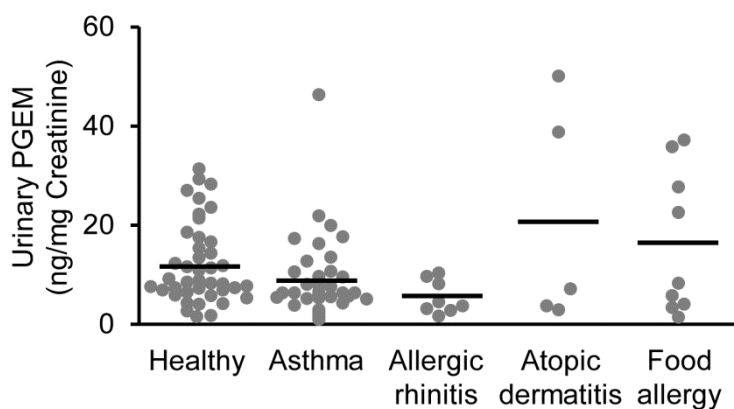

**Supplemental Figure 4. Tetranor-PGEM levels in human urine.** Urinary tetranor-PGEM in healthy human volunteers ( $n = 39$ ) and patients with asthma ( $n = 37$ ), allergic rhinitis ( $n = 8$ ), atopic dermatitis ( $n = 5$ ), and food allergy ( $n = 9$ ). The mean of the levels of tetranor-PGEM in each group is denoted by horizontal lines. Mean values were compared by the Kruskal–Wallis test. There was no significant difference among groups.

**Supplemental Table 1. Lipid mediators and metabolites in a method package (Shimadzu).**

| No. | Type | Product                                                      |
|-----|------|--------------------------------------------------------------|
| 1   | LA   | 13(S)-HODE                                                   |
| 2   | LA   | 9(S)-HODE                                                    |
| 3   | LA   | 13-OxoODE                                                    |
| 4   | LA   | 9-OxoODE                                                     |
| 5   | ALA  | 9(S)-HOTrE                                                   |
| 6   | ALA  | 13(S)-HOTrE                                                  |
| 7   | EDA  | (±)15-HEDE                                                   |
| 8   | EDA  | 15-OxoEDE                                                    |
| 9   | AA   | tetranor-PGFM                                                |
| 10  | AA   | tetranor-PGEM                                                |
| 11  | AA   | tetranor-PGDM                                                |
| 12  | AA   | 20-hydroxy Prostaglandin F <sub>2α</sub>                     |
| 13  | AA   | 20-hydroxy Prostaglandin E <sub>2</sub>                      |
| 14  | AA   | 18-carboxy dinor LTB <sub>4</sub>                            |
| 15  | AA   | 13,14-dihydro-15-keto-tetranor Prostaglandin F <sub>1β</sub> |
| 16  | AA   | 2,3-dinor-8-iso Prostaglandin F <sub>2α</sub>                |
| 17  | AA   | 13,14-dihydro-15-keto-tetranor Prostaglandin F <sub>1α</sub> |
| 18  | AA   | 6-keto-Prostaglandin F <sub>1α</sub>                         |
| 19  | AA   | 13,14-dihydro-15-keto-tetranor Prostaglandin D <sub>2</sub>  |
| 20  | AA   | 20-carboxy LTB <sub>4</sub>                                  |

|    |    |                                                                  |
|----|----|------------------------------------------------------------------|
| 21 | AA | 20-hydroxy LTB <sub>4</sub>                                      |
| 22 | AA | 13,14-dihydro-15-keto-tetranor Prostaglandin E <sub>2</sub>      |
| 23 | AA | 6,15-diketo-13,14-dihydro Prostaglandin F <sub>1α</sub>          |
| 24 | AA | iPF <sub>2α</sub> -IV                                            |
| 25 | AA | 8-iso-15(R)-Prostaglandin F <sub>2α</sub>                        |
| 26 | AA | 8-iso Prostaglandin F <sub>2α</sub>                              |
| 27 | AA | Thromboxane B <sub>2</sub>                                       |
| 28 | AA | 11β-Prostaglandin F <sub>2α</sub>                                |
| 29 | AA | 5-iPF <sub>2α</sub> -VI                                          |
| 30 | AA | 8-iso-15-keto Prostaglandin F <sub>2α</sub>                      |
| 31 | AA | Prostaglandin F <sub>2α</sub>                                    |
| 32 | AA | 8-iso-13,14-dihydro-15-keto Prostaglandin F <sub>2α</sub>        |
| 33 | AA | 8-iso Prostaglandin E <sub>2</sub>                               |
| 34 | AA | Prostaglandin E <sub>2</sub>                                     |
| 35 | AA | 11-dehydro Thromboxane B <sub>2</sub>                            |
| 36 | AA | 15-keto Prostaglandin F <sub>2α</sub>                            |
| 37 | AA | Prostaglandin D <sub>2</sub>                                     |
| 38 | AA | 11β-13,14-dihydro-15-keto Prostaglandin F <sub>2α</sub>          |
| 39 | AA | 15-keto Prostaglandin E <sub>2</sub>                             |
| 40 | AA | 14,15-LTC <sub>4</sub> , Eoxin C <sub>4</sub> , EXC <sub>4</sub> |
| 41 | AA | 13,14-dihydro-15-keto Prostaglandin F <sub>2α</sub> , PGFM       |
| 42 | AA | 5(S),6(R)-Lipoxin A <sub>4</sub>                                 |

|    |    |                                                    |
|----|----|----------------------------------------------------|
| 43 | AA | 13,14-dihydro-15-keto Prostaglandin E <sub>2</sub> |
| 44 | AA | Leukotriene D <sub>4</sub>                         |
| 45 | AA | 14,15-LTE <sub>4</sub> , Eoxin E <sub>4</sub>      |
| 46 | AA | 13,14-dihydro-15-keto Prostaglandin D <sub>2</sub> |
| 47 | AA | Leukotriene C <sub>4</sub>                         |
| 48 | AA | Leukotriene E <sub>4</sub>                         |
| 49 | AA | Leukotriene F <sub>4</sub>                         |
| 50 | AA | 8-iso Prostaglandin A <sub>2</sub>                 |
| 51 | AA | Prostaglandin A <sub>2</sub>                       |
| 52 | AA | 11-trans LTC <sub>4</sub>                          |
| 53 | AA | 11-trans LTE <sub>4</sub>                          |
| 54 | AA | Prostaglandin J <sub>2</sub>                       |
| 55 | AA | Prostaglandin B <sub>2</sub>                       |
| 56 | AA | 8,12-iso-iPF <sub>2α</sub> -VI 1,5- lactone        |
| 57 | AA | 8(S),15(S)-DiHETE                                  |
| 58 | AA | 6-trans LTB <sub>4</sub>                           |
| 59 | AA | 5(S),15(S)-DiHETE                                  |
| 60 | AA | Leukotriene B <sub>4</sub>                         |
| 61 | AA | 13,14-dihydro-15-keto Prostaglandin J <sub>2</sub> |
| 62 | AA | 12-oxo LTB <sub>4</sub>                            |
| 63 | AA | N-acetyl LTE <sub>4</sub>                          |
| 64 | AA | (±)14,15-DHET                                      |



|    |    |                                      |
|----|----|--------------------------------------|
| 65 | AA | 12(S)-HHTrE                          |
| 66 | AA | (±)11,12-DHET                        |
| 67 | AA | (±)8,9-DHET                          |
| 68 | AA | 20-carboxy arachidonic acid          |
| 69 | AA | (±)5,6-DHET                          |
| 70 | AA | 15-deoxy-delta12,14-PGJ <sub>2</sub> |
| 71 | AA | 20-HETE                              |
| 72 | AA | (±)18-HETE                           |
| 73 | AA | (±)17-HETE                           |
| 74 | AA | (±)16-HETE                           |
| 75 | AA | 15(S)-HETE                           |
| 76 | AA | 11(S)-HETE                           |
| 77 | AA | 8(S)-HETE                            |
| 78 | AA | 12(S)-HETE                           |
| 79 | AA | 5(S)-HETE                            |
| 80 | AA | 12-OxoETE                            |
| 81 | AA | (±)5,6-DHET-lactone                  |
| 82 | AA | (±)14(15)-EET                        |
| 83 | AA | 5-OxoETE                             |
| 84 | AA | (±)11(12)-EET                        |
| 85 | AA | (±)8(9)-EET                          |
| 86 | AA | (±)5(6)-EET                          |

|     |      |                                     |
|-----|------|-------------------------------------|
| 87  | AA   | Arachidonic Acid (AA)               |
| 88  | DGLA | 8-iso Prostaglandin F <sub>1α</sub> |
| 89  | DGLA | 8-iso Prostaglandin F <sub>1β</sub> |
| 90  | DGLA | 8-iso Prostaglandin E <sub>1</sub>  |
| 91  | DGLA | Prostaglandin E <sub>1</sub>        |
| 92  | DGLA | Prostaglandin D <sub>1</sub>        |
| 93  | DGLA | 8-iso Prostaglandin A <sub>1</sub>  |
| 94  | DGLA | 15(S)-HETrE                         |
| 95  | EPA  | 8-iso Prostaglandin F <sub>3α</sub> |
| 96  | EPA  | Prostaglandin E <sub>3</sub>        |
| 97  | EPA  | Prostaglandin D <sub>3</sub>        |
| 98  | EPA  | Lipoxin A <sub>5</sub>              |
| 99  | EPA  | (±)17,18-DiHETE                     |
| 100 | EPA  | (±)14,15-DiHETE                     |
| 101 | EPA  | 5,6-DiHETE                          |
| 102 | EPA  | 18(S)-HEPE                          |
| 103 | EPA  | 15(S)-HEPE                          |
| 104 | EPA  | 12(S)-HEPE                          |
| 105 | EPA  | 5(S)-HEPE                           |
| 106 | EPA  | Eicosapentaenoic Acid(EPA)          |
| 107 | DHA  | Resolvin D <sub>1</sub>             |
| 108 | DHA  | (±)16-HDoHE                         |

|     |     |                                |
|-----|-----|--------------------------------|
| 109 | DHA | (±)17-HDoHE                    |
| 110 | DHA | (±)13-HDoHE                    |
| 111 | DHA | (±)10-HDoHE                    |
| 112 | DHA | (±)14-HDoHE                    |
| 113 | DHA | (±)11-HDoHE                    |
| 114 | DHA | (±)7-HDoHE                     |
| 115 | DHA | (±)8-HDoHE                     |
| 116 | DHA | (±)4-HDoHE                     |
| 117 | DHA | Docosaheanoic Acid (DHA)       |
| 118 | EA  | PGF <sub>2α</sub> Ethanolamide |
| 119 | EA  | PGE <sub>2</sub> Ethanolamide  |
| 120 | EA  | PGE <sub>1</sub> ethanolamide  |
| 121 | EA  | PGD <sub>2</sub> Ethanolamide  |
| 122 | EA  | LTB <sub>4</sub> ethanolamide  |
| 123 | EA  | (±)14(15)-EET ethanolamide     |
| 124 | EA  | (±)11(12)-EET ethanolamide     |
| 125 | EA  | (±)8(9)-EET ethanolamide       |
| 126 | EA  | (±)5(6)-EET ethanolamide       |
| 127 | EA  | PEA (palmitoyl ethanolamide)   |
| 128 | EA  | Arachidonoyl ethanolamide      |
| 129 | EA  | OEA (oleoyl ethanolamide)      |
| 130 |     | PAF C-16                       |

|     |      |                                                      |
|-----|------|------------------------------------------------------|
| 131 | ISTD | tetranor-PGEM-d <sub>6</sub>                         |
| 132 | ISTD | 6-keto-Prostaglandin F <sub>1α</sub> -d <sub>4</sub> |
| 133 | ISTD | Thromboxane B <sub>2</sub> -d <sub>4</sub>           |
| 134 | ISTD | Prostaglandin F <sub>2α</sub> -d <sub>4</sub>        |
| 135 | ISTD | Prostaglandin E <sub>2</sub> -d <sub>4</sub>         |
| 136 | ISTD | Prostaglandin D <sub>2</sub> -d <sub>4</sub>         |
| 137 | ISTD | Leukotriene C <sub>4</sub> -d <sub>5</sub>           |
| 138 | ISTD | Leukotriene B <sub>4</sub> -d <sub>4</sub>           |
| 139 | ISTD | 5(S) HETE-d <sub>8</sub>                             |
| 140 | ISTD | 12(S) HETE-d <sub>8</sub>                            |
| 141 | ISTD | 15(S) HETE-d <sub>8</sub>                            |
| 142 | ISTD | PAF C-16-d <sub>4</sub>                              |
| 143 | ISTD | Oleoyl Ethanolamide-d <sub>4</sub>                   |

LA, linoleic acid. ALA,  $\alpha$ -linolenic acid. EDA, eicosadienoic acid. DGLA, dihomo- $\gamma$ -linolenic acid. AA, arachidonic acid. EPA, eicosapentaenoic acid. DHA, docosahexaenoic acid. EA, ethanolamide. ISTD, internal standard.
